# Supplementary material for: Gastrointestinal and Hepatological Manifestations in Severe Acute Respiratory Syndrome Coronavirus 2 Infection: Results from the Major COVID Hospital in Serbia
Source: MDPI journal article supplement (doi:10.3390/microorganisms12010027), 2023-12-22
Supplement: s1 [file s1]

## Supplementary Material

Note: The supplementary material accompanying this article:

The prevalence of GI manifestations and abnormal liver biochemistry regarding presence of CVD are shown in Supplementary Table S1.

**Supplementary Table S1.** Presence of CVD and prevalence of GI symptoms and abnormal liver biochemistry in patients with COVID-19.

| Characteristics         | Cardiovascular disease |             | Significance |
|-------------------------|------------------------|-------------|--------------|
|                         | No                     | Yes         |              |
| GI symptoms             |                        |             |              |
| GI symptoms/any         | 39 (42.9%)             | 81 (58.7%)  | p=0.019*     |
| Loss of appetite        | 15 (22.0%)             | 47 (29.7%)  | p=0.195      |
| Nausea                  | 3 (7.7%)               | 16 (8.7%)   | p=0.788      |
| Vomiting                | 2 (5.5%)               | 15 (8.7%)   | p=0.366      |
| Diarrhea                | 15 (16.5%)             | 28 (20.3%)  | p=0.470      |
| Liver chemistry         |                        |             |              |
| Elevated AST            | 59 (67.8%)             | 92 (66.7%)  | p=0.858      |
| Elevated ALT            | 52 (59.8%)             | 75 (54.7%)  | p=0.459      |
| Elevated bilirubin      | 17 (100.0%)            | 24 (82.8%)  | p=0.070      |
| Elevated GGT            | 49 (86.0%)             | 64 (75.3%)  | p=0.122      |
| Elevated AP             | 2 (13.3%)              | 9 (20.9%)   | p=0.518      |
| Elevated AST and/or ALT | 69 (79.3%)             | 111 (81.0%) | p=0.753      |
| Elevated: any chemistry | 77 (88.5%)             | 119 (85.2%) | p=0.620      |

\* Statistically significant.

Gastrointestinal manifestations were more frequent in patients with CVD than in patients who didn't have CVD (58.7% vs 42.9%,  $p<0.05$ ), while presence of CVD didn't affect the liver biochemistry tests (NS).

The prevalence of GI manifestations and abnormal liver biochemistry regarding presence of DM are shown in Supplementary Table S2.

**Supplementary Table S2.** Presence of DM and prevalence of GI symptoms and abnormal liver biochemistry in patients with COVID-19.

| <i>Characteristics</i> | <i>Diabetes Mellitus</i> |            | <i>Significance</i> |
|------------------------|--------------------------|------------|---------------------|
|                        | <i>No</i>                | <i>Yes</i> |                     |
| <i>GI symptoms</i>     |                          |            |                     |
| GI symptoms (all)      | 83 (48.3%)               | 37 (64.9%) | p=0.029*            |
| Loss of appetite       | 40 (23.3%)               | 21 (36.8%) | p=0.044*            |
| Nausea                 | 14 (8.1%)                | 5 (8.8%)   | p=0.881             |

|                               |              |            |          |
|-------------------------------|--------------|------------|----------|
| Vomiting                      | 9 (5.2%)     | 8 (14.0%)  | p=0.028* |
| Diarrhea                      | 33 (19.2%)   | 10 (17.5%) | p=0.783  |
| <b><i>Liver chemistry</i></b> |              |            |          |
| Elevated AST                  | 111 (66.18%) | 40 (70.2%) | p=0.569  |
| Elevated ALT                  | 99 (59.3%)   | 28 (49.1%) | p=0.181  |
| Elevated bilirubin            | 29 (90.6%)   | 12 (85.7%) | p=0.622  |
| Elevated GGT                  | 86 (81.1%)   | 27 (75.0%) | p=0.430  |
| Elevated AP                   | 6 (15.8%)    | 5 (20.5%)  | p=0.395  |
| Elevated AST and/or ALT       | 132 (79.0%)  | 48 (84.2%) | p=0.396  |
| Elevated: any chemistry       | 147 (87.5%)  | 49 (86.0%) | p=0.765  |

\* Statistically significant.

Gastrointestinal manifestations were more frequent in patients with DM than in patients who didn't have DM (64.9% vs 48.3%,  $p<0.05$ ), while presence of DM didn't affect the liver biochemistry tests (NS).

The prevalence of GI manifestations and abnormal liver biochemistry regarding presence of chronic kidney disease are shown in Supplementary Table S3.

**Supplementary Table S3.** Presence of chronic kidney disease and prevalence of GI symptoms and abnormal liver biochemistry in patients with COVID-19.

| Characteristics         | Kidney disease |            | Significance |
|-------------------------|----------------|------------|--------------|
|                         | No             | Yes        |              |
| GI symptoms             |                |            |              |
| GI symptoms (all)       | 111 (53.6%)    | 9 (40.9%)  | p=0.256      |
| Loss of appetite        | 57 (27.5%)     | 4 (18.2%)  | p=0.345      |
| Nausea                  | 15 (7.2%)      | 4 (18.2%)  | p=0.077      |
| Vomiting                | 15 (7.2%)      | 2 (9.1%)   | p=0.754      |
| Diarrhea                | 42 (20.3%)     | 1 (4.5%)   | p=0.072      |
| Liver chemistry         |                |            |              |
| Elevated AST            | 137 (67.5%)    | 14 (63.6%) | p=0.715      |
| Elevated ALT            | 117 (57.9%)    | 10 (45.5%) | p=0.262      |
| Elevated bilirubin      | 40 (88.9%)     | 1 (100.0%) | p=0.724      |
| Elevated GGT            | 105 (80.2%)    | 8 (72.7%)  | p=0.557      |
| Elevated AP             | 11 (20.8%)     | 0 (0%)     | p=0.258      |
| Elevated AST and/or ALT | 165 (81.7%)    | 15 (68.2%) | p=0.130      |
| Elevated: any chemistry | 178 (87.7%)    | 18 (81.8%) | p=0.435      |

The presence of chronic kidney disease didn't affect the liver biochemistry tests (NS), nor the presence of GI symptoms (NS).
